1 **Title: Community Support for Injured Patients: A Scoping Review and Narrative Synthesis**

2

3 Authors:

4 Rashi Jhunjunwala MD MA,<sup>1,2</sup> Anusha Jayaram MD MBA,<sup>1,2</sup> Carol Mita MLIS,<sup>3</sup> Justine  
5 Davies MD\*<sup>4,5</sup>, Kathryn Chu MD MPH FACS FASCRS\*<sup>5</sup>

6 \* Joint last authorship

7

8 Affiliations:

- 9 1. Program in Global Surgery and Social Change, Harvard Medical School, Boston,  
10 Massachusetts, USA
- 11 2. Department of Surgery, Beth Israel Deaconess Medical Center, Boston,  
12 Massachusetts, USA
- 13 3. Countway Library, Harvard Medical School, Boston, Massachusetts, USA
- 14 4. Institute of Applied Health Research, University of Birmingham, Birmingham, UK
- 15 5. Centre for Global Surgery, Department of Global Health, Faculty of Medicine and  
16 Health Sciences, Stellenbosch University, Stellenbosch, South Africa

17

18 Corresponding Author:

19 Prof Justine Davies; [J.Davies.6@bham.ac.uk](mailto:J.Davies.6@bham.ac.uk)

20

21 Corresponding Author for Submission:

22 Rashi Jhunjunwala; [rjhunjhu@bidmc.harvard.edu](mailto:rjhunjhu@bidmc.harvard.edu)

23

24 Word Count: 3391

25

26 **Abstract:**

27 BACKGROUND: Community-based support groups have been effective in facilitating access  
28 to and retention in the healthcare system for patients with HIV/AIDS, cancer, diabetes, and  
29 other communicable and non-communicable diseases. Given the high incidence of  
30 morbidity that results from traumatic injuries, and the barriers to reaching and accessing  
31 care for injured patients, community-based support groups may prove to be similarly  
32 effective in this population. OBJECTIVES: The objective of this review is to identify the extent  
33 and impact of community and peer support groups for injured patients. ELIGIBILITY: We  
34 included primary research on studies that evaluated community support groups that were  
35 solely based in the community. Hospital-based or healthcare-professional led groups were  
36 excluded. EVIDENCE: Sources were identified from a systematic search of Medline /  
37 PubMed, CINAHL, and Web of Science Core Collection. CHARTING METHODS: We utilized a  
38 narrative synthesis approach to data analysis. RESULTS: 4,989 references were retrieved  
39 from database search; 25 were included in final data extraction. There was a variety of  
40 methodologies represented, and the groups represented patients with spinal cord injury  
41 (N=2), traumatic brain or head injury (N=7), burns (N=4), intimate partner violence (IPV)  
42 (N=5), mixed injuries (N=5), torture (N=1), and brachial plexus injury (N=1). Multiple  
43 benefits were reported by support group participants; categorized as social, emotional,  
44 logistical, or educational benefits. CONCLUSIONS: community-based peer support groups  
45 can provide education, community, and may have implications for retention in care for  
46 injured patients.

47

48

49

50 **Introduction:**

51 The WHO estimates that 4.4 million people die from injuries such as acts of violence, road  
52 traffic accidents, falls, and burns annually, and 90% of these deaths occur in low- and  
53 middle-income countries (LMICs) (1). Millions more suffer non-fatal injuries that require  
54 extensive medical care and support (2). Injured patients often face many barriers to seeking,  
55 reaching, and receiving care (3). These barriers can prevent or delay rehabilitation that  
56 allows for return to optimal function, especially after the acute injury has been addressed.  
57 Given the potentially chronic conditions that result from injury, retention in care is  
58 necessary. However, injured peoples' needs go beyond retention in medical care; they often  
59 require care for ongoing psychological issues or matters of daily living which are often  
60 neglected by healthcare systems.

61

62 For patients with other medical conditions, peer and community support has been shown to  
63 facilitate access to healthcare through improved retention of current care, introduction to  
64 other providers of care, and provision of information and psychological support (4–7). Peer  
65 support has long been used within mental health services and has been defined as social  
66 emotional support that is mutually offered or provided by those with similar lived  
67 experiences (8). This process of support, companionship, and assistance often counter  
68 feelings of loneliness, discrimination, and frustration. The most common form of peer  
69 support has been self-help groups, which have been defined as a voluntary small group for  
70 mutual aid (9). Studies on peer support amongst HIV patients also demonstrate increased  
71 retention in care, improved anti-retroviral therapy adherence and viral suppression, and  
72 increased financial and moral support (10,11). Further, studies of pregnant women  
73 demonstrate the positive impact that peer-support can have on motherhood and coping

74 with issues like substance use (12,13). Engaging the community, especially for historically  
75 marginalized groups, has also been demonstrated to result in positive health outcomes  
76 (14,15). Further, meaningful engagement of and advocacy by members of the HIV/AIDS  
77 community has been shown to lead to improved HIV/AIDS services and policy changes that  
78 lead to better access to care and service provision (16,17).

79

80 Despite the similar needs of injured patients for ongoing medical care and the often life-  
81 changing nature of their injuries requiring psychological and physical support, there is little  
82 known about whether community-based peer support groups exist, benefit injured persons,  
83 or whether they play a role improving and retaining access to acute and chronic injury care.  
84 This scoping review aims to identify the extent and impact of community and peer support  
85 groups for injured patients.

86

## 87 **Methods:**

88 This scoping review is conducted based on the expanded Arksey and O'Malley framework  
89 and uses PRISMA-ScR guidelines (18,19).

90

### 91 *Defining the Research Question:*

92 We aimed to answer the question: what research has been done on the use of and benefits  
93 of health-system independent community-based support groups (i.e. those which are not  
94 based in healthcare facilities or run by healthcare professionals) for injured persons?

95

96

97

98 Search Strategy:

99 Studies reporting on community-based patient support groups for physical injuries were  
100 identified by a systematic search of Medline / PubMed (National Library of Medicine, NCBI);  
101 CINAHL (CINAHL Complete, EBSCOhost), and Web of Science Core Collection (Clarivate).  
102 Controlled vocabulary terms (i.e., MeSH; CINAHL thesaurus subject headings) were included  
103 when available and appropriate. The search strategies were designed and carried out by a  
104 librarian (CM). No language limits or date restrictions were applied. The exact search terms  
105 used for each of the databases are provided in the supplementary document.  
106 These searches were undertaken on March 1<sup>st</sup>, 2023. We also searched the grey literature  
107 via Google searches, reviewed injury society and trauma society web pages, and  
108 communicated with global experts in the field of injury research to identify additional  
109 studies evaluating the impact of these groups.

110

111 Study Inclusion and Exclusion:

112 Study inclusion and exclusion criteria are shown in **Table 1**. We included primary research  
113 studies as well as those which describe advocacy or policy changes to manage injuries, since  
114 community support groups have been advocates for improved care for other conditions  
115 such as HIV/AIDS (16,17).

116

117 We excluded studies that evaluated groups that were hospital or rehabilitation facility-  
118 based or led/created by healthcare providers. We also excluded all studies that focused on  
119 Post Traumatic Stress Disorder (PTSD) where it was not clear that the PTSD occurred  
120 because of physical injury.

121

122 **Table 1. Inclusion and exclusion criteria**

| Inclusion                                                                                                                                                                                                                                                                                                                                                                                                                                               | Exclusion                                                                                                                                                                                                                                                                                                                                                                                                                                                                                                                |
|---------------------------------------------------------------------------------------------------------------------------------------------------------------------------------------------------------------------------------------------------------------------------------------------------------------------------------------------------------------------------------------------------------------------------------------------------------|--------------------------------------------------------------------------------------------------------------------------------------------------------------------------------------------------------------------------------------------------------------------------------------------------------------------------------------------------------------------------------------------------------------------------------------------------------------------------------------------------------------------------|
| <ul style="list-style-type: none"><li>• All publications through March 1, 2023</li><li>• Studies of community or patient groups focused on peer-support of people who have been injured and evaluated the impact of community or patient groups for those people</li><li>• Studies that assess the needs and priorities of community-based patient groups for people who have been injured</li><li>• All countries</li><li>• English language</li></ul> | <ul style="list-style-type: none"><li>• Studies that evaluated groups that were either led or created by hospital-affiliated staff, healthcare providers, or rehabilitation facilities</li><li>• Studies of community support groups that focused on injury prevention, self-harm, health issues not related to the injury, or groups that focused only on mental health or Post Traumatic Stress Disorder</li><li>• Support groups that did not specify that the participants had experienced physical injury</li></ul> |

123

124 Study Screening & Data Extraction

125 All studies found were uploaded into Covidence for screening and data extraction.

126 Covidence is a web-based collaboration software platform that streamlines the production  
127 of systematic and other literature reviews.(20) Two reviewers (RJ, AJ) screened all titles and  
128 abstracts independently for inclusion. In case of disagreement, RJ and AJ resolved conflicts  
129 through discussion. This process was repeated for full text review in Covidence.

130 A data extraction form was developed and each of two reviewers independently extracted  
131 data from each article, after which consensus was reached through review and discussion.

132 Study data points collected were study design, funding, injury type, the study population,  
133 number of participants, what content was shared in the group, and discussion themes in the  
134 group. We also collected data on the country in which the support group was based, the  
135 country of the study's first and last author, and the years the study was conducted and  
136 published.

137

138

139

140 Data Analysis

141 We approached the data analysis for this review via a narrative synthesis  
142 methodology. Since our inclusion criteria did not preclude any specific study methodologies,  
143 we expected variety and heterogeneity in our final study sample. We did not assess study  
144 quality in this scoping review.

145

146 Funding

147 This study was conducted as part of the Equi-Injury Study, funded by the UK National  
148 Institute of Health and Care Research, NIHR Global Health Groups Call 3, application 133135.

149

150 Synthesis of Results

151 The outcomes were grouped into three categories. The first category was study  
152 characteristics, which includes study methodology, years during which the studies were  
153 conducted, geographic location of support groups, and presence or absence of study  
154 funding. We next reported on support group characteristics, including type of injury,  
155 number of participants, leadership, and facilitation of the groups, and whether the group  
156 itself received funding. Finally, we reported the summary of benefits described by the  
157 support group members – this was categorised by outcomes for all injury types together  
158 and then by specific injury type.

159

160 **Results:**

161 Study Characteristics

162 4,989 references (PubMed: 2343; CINAHL: 1077; Web of Science: 1569) were retrieved from  
163 the database searches on March 1, 2023. Duplicate records were removed using EndNote;

164 import into Covidence resulted in 3489 unique references for screening. Of these, 112 were  
165 included for full text review. Full text was not recoverable for 13 studies due to  
166 unavailability online through Harvard libraries or inter-library loan. Of the 99 full texts that  
167 were reviewed, 25 studies met criteria for data extraction (**Figure 1**).

168

169 **Figure 1.** PRISMA Flow diagram

170

171 *Study characteristics*

172 Of the 25 studies included, eleven used purely qualitative methodology, six were cross-  
173 sectional quantitative studies, three used mixed-methods, three were case reports, and  
174 there were two randomized controlled trials. Studies were published from 1981 to 2022.  
175 Eleven studies were conducted in the US, seven in Canada, and three in both countries.  
176 There was one study each from the UK and South Africa. There were two studies in which  
177 the peer support occurred in the form of online forums and thereby were not limited by  
178 geographic region. **Table 2** presents an overview of the 25 studies included in data  
179 extraction.

180

181 *Support Group Characteristics*

182 Community-based peer support groups have been studied for persons with spinal cord  
183 injury (N=2), traumatic brain or head injury (N=7), burns (N=4), intimate partner violence  
184 (IPV) (N=5), mixed injuries (N=5), torture (N=1), and brachial plexus injury (N=1). The  
185 number of support group members ranged from 2 to 60+, with the majority of the groups  
186 reporting 20-40 active members. Fifteen studies reported on whether group leadership was  
187 provided by members themselves or an external facilitator such as professional facilitators,



188 therapists, social workers, or social work or therapy students. Of these fifteen studies,  
189 seven reported that the groups were run by professionals rather than participant  
190 volunteers, two groups were run by non-professional facilitators, five groups reported that  
191 peers volunteered or rotated through leading the groups, and one group utilized one-to-one  
192 peer mentorship. Data about the group facilitators were unavailable or unclear for the  
193 remaining studies. Seven peer-support groups reported receiving funding for the groups'  
194 activities or meetings – one from the Alberta Worker's Compensation Board and six from  
195 philanthropic organizations.

196

### 197 *Benefits Reported by Support Group Participants*

198 There were a variety of positive benefits reported by support group members. These were  
199 grouped into educational benefits, social benefits, emotional benefits, and logistical benefits  
200 **(Figure 2)**.

201 **Figure 2.** Categories of peer support reported in all studies; number of studies per grouping  
202 indicated within boxes.

203

204 Thirteen of 25 studies concluded that shared educational or didactic material in the group  
205 was a benefit of participation (21–33). Eight studies reported that they valued and  
206 appreciated the sharing of medical knowledge, either via dissemination from the group  
207 leadership or between participants within the groups (24,26–30,32,34).

208

209 From a social perspective, nineteen studies reported that support group members indicated  
210 they were able to obtain guidance and coping strategies as a result of group participation  
211 (21,23–26,28–33,35–42), and fourteen studies reported that the groups created a sense of  
212 solidarity and group identity that members found lacking in other areas of their lives

213 (24,26,30,33–35,37–39,41–44,25). Social interaction was mentioned as a positive outcome  
214 in eleven studies (22–24,26,32,33,36,38,40,42,44).

215

216 Emotional outcomes constituted a substantial portion of the reported benefits. Fourteen of  
217 the studies reported that participants found emotional support and/or catharsis as a  
218 function of group membership (21,24,26–29,31–33,38–42), and fourteen studies reported  
219 that group members felt a sense of not feeling alone (22–24,28,29,31,33–  
220 35,37,39,40,42,44) after they joined the group. Group participants in eleven studies  
221 reported a benefit to their self-esteem, empowerment, and overall quality of life  
222 (22,24,25,32,34,35,37,38,40–42). Six studies noted that support groups gave participants a  
223 sense of hope for the future (26,32,35,37,39,42). Finally, seven studies reported that  
224 participants felt a sense of altruism and being able to give back to other injury survivors as a  
225 result of group participation (25,26,28,30,35,37,39). On a practical level, eleven studies  
226 reported that group members found that they were able to gain assistance in navigating the  
227 health, legal, and/or social systems from their peers (23,26–30,32,40–42,45).

228

229 We also evaluated the types of benefits reported by groups for people with specific types of  
230 injuries. We focused on studies reporting on brain injury support groups, burn injury  
231 support groups, intimate partner violence support groups, and mixed injury support groups,  
232 as these injury types were the subject of more than two studies included in this review.

233 Table 3 shows the distribution of each type of support reported by each injury group.

234

235 **Table 3.** Types of peer support provided in injury specific groups

| Injury type<br>(total number<br>of studies) | Emotional<br>support | Educational<br>support | Social<br>support | Logistical<br>support |
|---------------------------------------------|----------------------|------------------------|-------------------|-----------------------|
|---------------------------------------------|----------------------|------------------------|-------------------|-----------------------|

|                  |   |   |   |   |
|------------------|---|---|---|---|
| Brain injury (7) | 7 | 7 | 7 | 4 |
| Burn injury (4)  | 3 | 1 | 4 | 0 |
| IPV (5)          | 4 | 1 | 5 | 2 |
| Mixed injury (5) | 4 | 2 | 4 | 4 |

236  
237 Considering the types of benefits reported by people with specific types of injuries, out of  
238 the seven studies reporting on brain injury support groups, six studies mentioned that  
239 participants found support in the form of guidance and coping strategies from the groups  
240 (21,26,28,30,32,33). Of the four studies reporting on patients with burn injuries, three  
241 reported that participants appreciated the feeling of not being alone that they received  
242 from the group (22,35,37). All five studies reporting on intimate partner violence support  
243 groups reported that participants gained a sense of group identity or solidarity from the  
244 group (31,40,41,43,44). Lastly, four of the five support groups for mixed injuries reported  
245 that they appreciated the assistance they received from peers in navigating health and legal  
246 systems (23,29,42,45).

247

## 248 **Discussion:**

249 We found only 25 studies which assessed the benefits of community support groups for  
250 injured persons, globally. The majority were created for specific types of injury and only one  
251 was located in a low- or middle-income country (South Africa). Injury, especially in males  
252 under 30 years of age, is responsible for a significant portion of illness around the world; the  
253 need to be retained in care for chronic disabilities that may result from injuries is essential  
254 for maximising health and well-being. In addition, the psychological components of both  
255 intentional (46) (i.e. interpersonal violence) as well as unintentional (road traffic crashes)  
256 injuries can be substantial (47). Community support groups have been shown to be useful  
257 for retention in care and both physical and mental health improvement in other conditions,

258 and thus offer potential for people who have been injured. This scoping review shows there  
259 are few community-based peer support groups offered for patients with injuries, and  
260 although these studies report on mental health benefits of peer support, there is little data  
261 on whether they improve physical health or retention in care.

262

263 People with traumatic injuries potentially face a unique challenge in finding peer support  
264 after their injury as injured patients often experience multiple types of injuries in the same  
265 event resulting in a broad range of outcomes (48). This means that injuries do not easily fit  
266 into specific disease-based support groups, which is evident even in the array and  
267 distribution of community-based peer support groups identified in this review. While there  
268 were four support groups for those with mixed injuries, twenty-one of the groups for which  
269 injury-related support groups exist focus on a specific type of injury with which prospective  
270 participants could identify. This distribution of injury groups which we found in our review  
271 does not represent the full spectrum of injury types. For example, there were no studies  
272 which reported on groups that focused on people with abdominal or thoracic trauma, which  
273 can result in significant disability and often is followed by fragmentation of care (49).  
274 Additionally, there were no specific peer support groups identified for those with  
275 mechanism-based injuries, such as road traffic injuries or firearm injury, although these  
276 mechanisms are some of the highest contributors to death and disability worldwide (50–  
277 52). This fragmentation of support groups that we found means that many people with  
278 injuries will miss out on opportunities for support. It also means that there is less of an  
279 opportunity for groups to advocate for general injury prevention or access to care, if they  
280 are limited to individual types of injuries. Whereas, it is known that there is power in  
281 bringing fragmented groups together (53–55).

282

283 The studies in this review identified positive benefits of community support groups for  
284 injured people, including creation of a group identity and regaining of self-esteem,  
285 emotional support and guidance, and delivery of practical knowledge about their disease,  
286 recovery and treatment process, or ways to access medical, legal, or social support. Several  
287 studies reported multiple types of benefit. This mirrors the positive effects of support groups  
288 for people living with diabetes (56), mental health problems (57), and heart disease (58),  
289 where support groups have been shown to help with sharing of practical knowledge and  
290 health education, social and emotional support, navigation of the medical system, and  
291 building trust-based relationships. Further, and highly applicable to injured patients, peer-led  
292 and community-based support groups have implications for rehabilitation, which can reduce  
293 limitations in functionality (59) especially in LMICs when access to medical care can be  
294 difficult to obtain.

295

296 We found only one study that was conducted in an LMIC setting. Given the high burden of  
297 injury in LMICs where trauma care systems can be especially fragmented resulting in worse  
298 access and outcomes for patients (60), there is scope for community-based peer support  
299 groups to help bridge the gaps in these much-needed services. There is a lack of reporting  
300 on the presence of these types of groups in LMICs aside from those developed for patients  
301 who carry diagnoses like HIV/AIDS that have been given prominent status on the global  
302 health agenda. Peer support has shown efficacy in reducing costs of care, engaging those  
303 who are often hard to reach, and providing patient-centered support to empower  
304 individuals to manage and direct their care (61). In LMICs, these effects are most often  
305 reported in groups that are focused on a more narrow or defined disease process that are

306 commonly diagnosed in LMIC settings. Twenty-six of the 53 studies in Øgård-Repål et al's  
307 review of peer support groups for people living with HIV were undertaken in LMICs (62) and  
308 Ayala reported 27 of the 48 studies in a separate scoping review of peer and community led  
309 responses to HIV were based in the global south (63).

310

311 There are data describing the benefits of community-based peer-to-peer support for  
312 patients who experience a broader range of conditions as well, such as mental health  
313 conditions or cancer (64), but these studies are also largely limited to high-income country  
314 (HIC) settings. In a systematic review and meta-analysis, Lyons et al analysed 8 RCTs  
315 evaluating peer group support for people experiencing mental health disorders; 7 of these  
316 were set in the USA, and one in Switzerland (65). Moreover, Arjadi et al found only 3 RCTs in  
317 their systematic review evaluating online interventions for mental health set in LMICs (66).  
318 While cancer and mental health disorders are common in LMICs as well as HICs and support  
319 groups for these conditions could improve outcomes for these patients, community-based  
320 peer support groups may be especially useful in providing psychosocial, knowledge, and  
321 logistical support to those affected by the high burden of injuries in LMICs in addition to  
322 ameliorating challenges in healthcare access that delay rehabilitation and medical  
323 treatment in these settings.

324

#### 325 Gaps in the literature:

326 The literature is sparse & highly observational in nature, which limits the conclusions that  
327 can be drawn on the effectiveness of the groups. However, as the community-based nature  
328 of these types of support groups at the center of this topic, it would be difficult to conduct  
329 any true RCTs. Additional observational or survey-based studies might be the only way to

330 discern the effects of the studies. Furthermore, many of the studies that were screened but  
331 excluded during this review involved support groups run out of healthcare facilities or under  
332 the leadership of healthcare professionals, which shows that while support groups do exist,  
333 many still are linked to health care systems.

334

### 335 Limitations:

336 Our scoping review was limited to articles in the databases we searched and to articles for  
337 which we were able to locate full texts. There may be more grey literature available that  
338 speaks to the existence and experience of other peer support groups, which was not  
339 covered in our review. Additionally, since almost all groups studied existed in high income  
340 countries it is highly possible that peer support groups also exist in LMICs but were not  
341 studied or published in peer-reviewed journals. This also limits the cultural perspective of  
342 the studies, and this review might not include aspects of patient experience and care that  
343 are important in countries not included in this study. Finally, with such a small sample of  
344 studies, our conclusions are limited.

345

### 346 Conclusions

347 While sparse, these data show that community-based support groups play a role in patient  
348 recovery and emotional wellbeing after injury. There is a role for information sharing and  
349 support that may lead to increased access and retention of care for injured persons. Aside  
350 from access and retention in the medical system, support groups can provide practical  
351 guidance for participants in navigating legal systems, as well as in developing connections  
352 with other patients and survivors to access to support services. Given the burden of injury  
353 that occurs in LMICs, support for development of community-based peer support groups in

354 LMICs may increase access to care and has implications for overall improvement in  
355 healthcare delivery.



**Table 2: Summary Table of Included Studies**

| Title                                                                                                         | First Author, Year | Country in which the study was conducted | Data collection period | Funding for Group | Study Aim                                                                                                                                                                                                                                                                | Study Design             | Injury Type  | Number of participants | Study Findings                                                                                                                                                                                                                                                                                                |
|---------------------------------------------------------------------------------------------------------------|--------------------|------------------------------------------|------------------------|-------------------|--------------------------------------------------------------------------------------------------------------------------------------------------------------------------------------------------------------------------------------------------------------------------|--------------------------|--------------|------------------------|---------------------------------------------------------------------------------------------------------------------------------------------------------------------------------------------------------------------------------------------------------------------------------------------------------------|
| Comparison of a Cognitive-Behavioral Coping Skills Group to a Peer Support Group in a Brain Injury Population | Backhaus, 2016     | USA                                      | Not Reported           | None              | To examine whether group CBT would result in improved perceived self-efficacy (PSE), emotional functioning, and neurobehavioral functioning compared with a structurally similar peer support group program for BI                                                       | Randomized control trial | Brain Injury | 38                     | Individuals with BI and their caregivers may benefit from either group CBT or a peer support group, with a trend for those received group CBT to maintain the effects of improved PSE. For our review, we extracted data solely from the control group, which functioned as a support group in its own right. |
| Helping others heal: burn survivors and peer support                                                          | Badger, 2010       | US/Canada                                | Not Reported           | None              | To evaluate perceptions of peer support and the value they placed on it related to the key burn recovery outcome variables of: social comfort, life satisfaction, QOL (body image, affect, interpersonal relationships, sexuality, productivity, and social integration. | Cross Sectional          | Burn         | 95                     | Burn survivors held a positive regard for peer support, with it being ranked as the best resource of the Phoenix society.                                                                                                                                                                                     |
| Adult burn survivors' views of peer support: a qualitative study                                              | Badger, 2010       | Canada                                   | 2007                   | None              | To learn from burn survivors whether peer support was important to them in their recovery and why, and secondarily, if they had volunteered as a                                                                                                                         | Qualitative              | Burn         | 30                     | Burn survivors highly valued peer support, especially by providing hope, combatting isolation, and lessening the feeling of being stigmatized due to physical scars.                                                                                                                                          |

|                                                                                                                 |                    |                                          |                        |                                                                                                              | peer supporter, if there were any negative consequences or advice they would have for others.                                                                        |              |                    |                                                       |                                                                                                                                                                                                                                      |
|-----------------------------------------------------------------------------------------------------------------|--------------------|------------------------------------------|------------------------|--------------------------------------------------------------------------------------------------------------|----------------------------------------------------------------------------------------------------------------------------------------------------------------------|--------------|--------------------|-------------------------------------------------------|--------------------------------------------------------------------------------------------------------------------------------------------------------------------------------------------------------------------------------------|
| Title                                                                                                           | First Author, Year | Country in which the study was conducted | Data collection period | Funding for Group                                                                                            | Study Aim                                                                                                                                                            | Study Design | Injury Type        | Number of participants                                | Study Findings                                                                                                                                                                                                                       |
| Processes and outcomes of a communalization of trauma approach: Vets & Friends community-based support groups   | Balmer, 2021       | USA                                      | 2017                   | None                                                                                                         | To inform training and group leader support procedures to ensure the maximal functioning and effectiveness of V&F support groups                                     | Qualitative  | Mixed Injury group | 23                                                    | Outcomes included restoration of trust, connection with group members, building skills to manage trauma, and community acceptance and engagement. It also found that Vets and Friends could possible meeting veteran specific needs. |
| Making meaning in a burn peer support group: qualitative analysis of attendee interviews                        | Davis, 2014        | USA                                      | 2010-2011              | None                                                                                                         | To better understand the psychosocial recovery needs of burn survivors and the role of peer support groups, by performing a series of guided qualitative interviews. | Qualitative  | Burn               | 6 interviewees, 6 key informants, 30-50 group members | The support group was instrumental to their psychosocial adjustment and growth. It allowed them to make meaning of their injury, learn coping strategies, make meaningful relationships, and have hope.                              |
| Constructing robust selves after brain injury: positive identity work among members of a female self-help group | Gelech, 2019       | Canada                                   | 2012                   | Saskatchewan Association for the Rehabilitation of the Brain Injured Shoppers Drug Mart Foundation for Women | To understand the work around identity in rehabilitation contexts by analysing how survivors construct the self in a female acute BI survivor self-help group.       | Qualitative  | Brain Injury       | 5                                                     | Four modes of identity work were seen: constructing competent selves, tempering the threat of loss and impairment, resisting infantilization and delegitimization, and asserting a collective gender identity.                       |

| Title                                                                                                                                                     | First Author, Year | Country in which the study was conducted | Data collection period       | Funding for Group | Study Aim                                                                                                                                                                                                       | Study Design    | Injury Type        | Number of participants                                    | Study Findings                                                                                                                                                                                                                                                                  |
|-----------------------------------------------------------------------------------------------------------------------------------------------------------|--------------------|------------------------------------------|------------------------------|-------------------|-----------------------------------------------------------------------------------------------------------------------------------------------------------------------------------------------------------------|-----------------|--------------------|-----------------------------------------------------------|---------------------------------------------------------------------------------------------------------------------------------------------------------------------------------------------------------------------------------------------------------------------------------|
| Long-Term Social Reintegration Outcomes for Burn Survivors With and Without Peer Support Attendance: A Life Impact Burn Recovery Evaluation (LIBRE) Study | Grieve, 2020       | US/Canada                                | October 2014 - December 2015 | None              | To determine the association of peer group attendance with the societal reintegration of a large group of burn survivors from the US and Canada using the Life Impact Burn Recovery Evaluation (LIBRE) profile. | Cross Sectional | Burn               | 601 responded to survey; 330 participated in peer support | Burn survivors who attended peer support groups had better scores on social iterations, social activities, and work and employment than those who did not. Those who attended also had larger burns and were more likely to be more than 10 years out from injury.              |
| Accessing peers' and health care experts' wisdom: a telephone peer support program for women with SCI living in rural and remote areas                    | Jalovicic, 2009    | Canada                                   | 2004                         | None              | To capture the essence of women's experiences of the Telephone Peer Support Group program and its main characteristics and structure as perceived by participants.                                              | Qualitative     | Spinal Cord Injury | 7                                                         | The participatory approach of this group allowed participants to control the direction of the group, allowing for emotional support and exchange. There were 17 core themes that were grouped into four structures: space, relation to self, relation to others, and causality. |
| Group therapy for refugees and torture survivors: treatment model innovations                                                                             | Kira, 2012         | USA                                      | 2006-2008                    | None              | To develop group therapy models based on thorough and in-depth analyses of the nature of torture and its psychosocial effects through the study of a social organization for                                    | Case Report     | Torture/ Refugee   | 20 women (first group); 8-12 families (2nd group)         | Group therapy for torture survivors is an important part of the comprehensive rehabilitation approach for survivors, and that group therapies extend into community healing.                                                                                                    |

|                                                                                                                                                                                                           |                    |                                          |                              |                                                                    | Bhutanese torture survivors.                                                                                                                                                                                                                                                                                                                                                                                                                     |                                                         |                                    |                        |                                                                                                                                                                                                                                                                                                                                                                                                                                                                                                  |
|-----------------------------------------------------------------------------------------------------------------------------------------------------------------------------------------------------------|--------------------|------------------------------------------|------------------------------|--------------------------------------------------------------------|--------------------------------------------------------------------------------------------------------------------------------------------------------------------------------------------------------------------------------------------------------------------------------------------------------------------------------------------------------------------------------------------------------------------------------------------------|---------------------------------------------------------|------------------------------------|------------------------|--------------------------------------------------------------------------------------------------------------------------------------------------------------------------------------------------------------------------------------------------------------------------------------------------------------------------------------------------------------------------------------------------------------------------------------------------------------------------------------------------|
| Title                                                                                                                                                                                                     | First Author, Year | Country in which the study was conducted | Data collection period       | Funding for Group                                                  | Study Aim                                                                                                                                                                                                                                                                                                                                                                                                                                        | Study Design                                            | Injury Type                        | Number of participants | Study Findings                                                                                                                                                                                                                                                                                                                                                                                                                                                                                   |
| Observations from practice: support group membership as a process of social capital formation among female survivors of domestic violence                                                                 | Larance, 2004      | USA                                      | January 2000 - December 2002 | Jersey Battered Women's Service, Inc.'s Community Outreach Program | To explore the authors' practice observations of female domestic violence survivors' journey from first agency contact to active participation in a support group process.                                                                                                                                                                                                                                                                       | Mixed Methods (Participant Observation and Survey Data) | Physical Intimate Partner Violence | 412                    | Support groups provide abused women with the opportunity to build trust and networks, with demonstrations of calling on these relationships outside of the agency's confines for support and enjoyment.                                                                                                                                                                                                                                                                                          |
| Using an integrated knowledge translation approach to inform a pilot feasibility randomized controlled trial on peer support for individuals with traumatic brain injury: A qualitative descriptive study | Lau, 2021          | Canada                                   | 2021                         | None                                                               | (1) To understand key informants' perspectives of the barriers and facilitators of participating in peer support research and programs among individuals with TBI; (2) to understand key informants' perspectives on the perceived impacts of peer support programs on individuals with TBI; and, (3) to demonstrate how an iKT approach can inform the development and implementation of a pilot feasibility randomized controlled trial (RCT). | Qualitative                                             | Brain Injury                       | 22                     | There were five main themes related to the barriers and facilitators to participating in peer support research and programs: knowledge, awareness, and communication; logistics of participating; readiness and motivation to participate; need for clear expectations; and matching. There were three main themes related to the perceived impact of peer support: acceptance, community, social experiences; vicarious experience/learning through others: shared experiences, role-modelling, |

|                                                                                                              |                    |                                          |                        |                   |                                                                                                                                                                                                                                  |                          |                    |                        | encouragement; and “I feel better.”                                                                                                                                                                                                                                                                                                                                                                                                                                                                                                                                                                |
|--------------------------------------------------------------------------------------------------------------|--------------------|------------------------------------------|------------------------|-------------------|----------------------------------------------------------------------------------------------------------------------------------------------------------------------------------------------------------------------------------|--------------------------|--------------------|------------------------|----------------------------------------------------------------------------------------------------------------------------------------------------------------------------------------------------------------------------------------------------------------------------------------------------------------------------------------------------------------------------------------------------------------------------------------------------------------------------------------------------------------------------------------------------------------------------------------------------|
| Title                                                                                                        | First Author, Year | Country in which the study was conducted | Data collection period | Funding for Group | Study Aim                                                                                                                                                                                                                        | Study Design             | Injury Type        | Number of participants | Study Findings                                                                                                                                                                                                                                                                                                                                                                                                                                                                                                                                                                                     |
| A Pilot Feasibility Randomized Controlled Trial on the Ontario Brain Injury Association Peer Support Program | Levy, 2021         | Canada                                   | 2021                   | None              | The overall objective of this study was to determine the feasibility of conducting an RCT and the preliminary effectiveness of the OBIA Peer Support Program                                                                     | Randomized control trial | Brain Injury       | 13                     | The study found no statistically significant results for community integration, mood, or self-efficacy; however, changes in these outcomes were accompanied by moderate-to-large effect sizes. Within health-related quality of life, the mean pain score of the intervention group was significantly lower than that of the control group at the two-month timepoint but not at completion. Interviews revealed proximal improvements in knowledge, skills, and goals, and identified two domains related to trial acceptability: (1) environmental context and resources, and (2) reinforcement. |
| Unexpected barriers in return to work: lessons learned from injured worker peer support groups               | MacEachen, 2007    | Canada                                   | 2004                   | None              | To study injured worker peer support groups for an empirical picture of return-to-work difficulties, including how peer support performs both positive and negative return-to-work functions at the individual and policy level. | Qualitative              | Mixed injury group | 37                     | The study identified four dimensions of peer support: worker experience of being misunderstood by system providers, need for advocates, social support, and help with procedural complexities of the workers' compensation and health care systems. It concluded                                                                                                                                                                                                                                                                                                                                   |

| Title                                                                                       | First Author, Year | Country in which the study was conducted | Data collection period | Funding for Group                      | Study Aim                                                                                                                                                                    | Study Design    | Injury Type                        | Number of participants            | Study Findings                                                                                                                                                                                                                                                                                                                                                                                                     |
|---------------------------------------------------------------------------------------------|--------------------|------------------------------------------|------------------------|----------------------------------------|------------------------------------------------------------------------------------------------------------------------------------------------------------------------------|-----------------|------------------------------------|-----------------------------------|--------------------------------------------------------------------------------------------------------------------------------------------------------------------------------------------------------------------------------------------------------------------------------------------------------------------------------------------------------------------------------------------------------------------|
| Support groups for injured workers: process and outcomes                                    | Mignone, 1999      | Canada                                   | 1992-1994              | Workers' Compensation Board of Alberta | This study evaluated the impact of support groups on injured workers with musculoskeletal injuries in relation to pain, somatization, depression, and pain-locus-of-control. | Cross Sectional | Mixed Injury group                 | 62 in intervention; 40 comparison | that peer support groups can be part of the return to work for workers, but there is also a need for more sensitivity to structural and social issues.<br><br>The study found that between those who did and didn't participate in the support groups, there was no demonstrable effect on the well-being of those who did participate, but it could not rule out any benefits of participating in support groups. |
| Divorcing abused Latina immigrant women's experiences with domestic violence support groups | Molina, 2009       | USA                                      | Not Reported           | None                                   | The purpose of this study was to explore and describe the experiences of Latina immigrants who had been members of 1 year-long domestic violence support groups.             | Cross Sectional | Physical Intimate Partner Violence | 15                                | Overall the group experience was positive, with members learning about the domestic violence cycle, how to understand their children, their childhood abuse, and legal information on their situation. The members felt like they made friends, felt protected, comfortable, and understood, and gave them courage to fight.                                                                                       |

| Title                                                                                                                              | First Author, Year    | Country in which the study was conducted | Data collection period | Funding for Group       | Study Aim                                                                                                                                                                      | Study Design                                                             | Injury Type                        | Number of participants | Study Findings                                                                                                                                                                                                                                        |
|------------------------------------------------------------------------------------------------------------------------------------|-----------------------|------------------------------------------|------------------------|-------------------------|--------------------------------------------------------------------------------------------------------------------------------------------------------------------------------|--------------------------------------------------------------------------|------------------------------------|------------------------|-------------------------------------------------------------------------------------------------------------------------------------------------------------------------------------------------------------------------------------------------------|
| From isolation to connection: understanding a support group for Hispanic women living with gender-based violence in Houston, Texas | Morales, 2009         | USA                                      | 2005                   | La Rosa Family Services | To examine how the community based organization's support group encourages immigrant Hispanic women to focus on developing tools and strategies, self-esteem, and empowerment. | Mixed Methods (Archival research, Interviews, & Participant Observation) | Physical Intimate Partner Violence | 30                     | Women enjoyed the benefits of the support group and were taught to manage situations, emotions, and becoming less dependent on the abuser. They also became more aware of their self-worth and value and are making efforts towards self-sufficiency. |
| A Thematic Analysis of Online Discussion Boards for Brachial Plexus Injury                                                         | Morris, 2016          | Internet                                 | 2015                   | None                    | The purpose of this study was to examine posts on Internet discussion groups dedicated to brachial plexus injury and identify common ideas through thematic analysis           | Qualitative                                                              | Brachial Plexus Injury             | 336 posts              | Themes focused on emotional aspects of brachial plexus injury and information support related to the disease, treatment, recovery after treatment, and process of seeking care.                                                                       |
| Helping the patient cope with the sequelae of trauma through the self-help group-approach                                          | Scanlon-Schlipp, 1981 | USA                                      | Not Reported           | None                    | To describe the development of Trauma Recovery, a self-help group                                                                                                              | Case Report                                                              | Mixed injury group                 | n/a                    | The self-help group is an effective means for recoverees to engage in therapeutic activities and is cost efficient. The Trauma Recovery program has a psychosocial emphasis and has established a groundwork for regional chapters.                   |

| Title                                                                                                                    | First Author, Year | Country in which the study was conducted | Data collection period | Funding for Group                  | Study Aim                                                                                                                                    | Study Design | Injury Type  | Number of participants | Study Findings                                                                                                                                                                                                                                                                                                                                                         |
|--------------------------------------------------------------------------------------------------------------------------|--------------------|------------------------------------------|------------------------|------------------------------------|----------------------------------------------------------------------------------------------------------------------------------------------|--------------|--------------|------------------------|------------------------------------------------------------------------------------------------------------------------------------------------------------------------------------------------------------------------------------------------------------------------------------------------------------------------------------------------------------------------|
| Helping factors in a peer-developed support group for persons with head injury, Part 2: Survivor interview perspective   | Schulz, 1994       | USA                                      | 1993                   | Vital Active Life after Trauma Inc | The purpose of the study was to determine the perspective of group members relative to helping factors in their peer-developed support group | Qualitative  | Brain Injury | 4                      | Eleven helping factors were generated: socializing, finding out other people's perspectives and attitudes, expressing thoughts and feelings, receiving support, feeling something in common, gaining understanding, empathy and acceptance through listening and sharing, getting perspective, helping others, getting help, feeling hope, and learning more about BI. |
| Helping factors in a peer-developed support group for persons with head injury, Part 1: Participant observer perspective | Schwartzberg, 1994 | USA                                      | Not Reported           | Vital Active Life after Trauma Inc | An ethnographic study to identify the helping factors in a peer-developed support group for persons who survived a traumatic head injury.    | Qualitative  | Brain Injury | 13                     | Positive attributes in a successful peer support group were feeling a part of the group, having a common problem and being able to validate the effects of an injury, and receiving information through a variety of channels.                                                                                                                                         |



| Title                                                                                                                         | First Author, Year | Country in which the study was conducted | Data collection period       | Funding for Group | Study Aim                                                                                                                                                                                                                                                                                                                                                                                                                                                                                   | Study Design    | Injury Type        | Number of participants | Study Findings                                                                                                                                                                                                                                                                                           |
|-------------------------------------------------------------------------------------------------------------------------------|--------------------|------------------------------------------|------------------------------|-------------------|---------------------------------------------------------------------------------------------------------------------------------------------------------------------------------------------------------------------------------------------------------------------------------------------------------------------------------------------------------------------------------------------------------------------------------------------------------------------------------------------|-----------------|--------------------|------------------------|----------------------------------------------------------------------------------------------------------------------------------------------------------------------------------------------------------------------------------------------------------------------------------------------------------|
| Promoting group empowerment and self-reliance through participatory research: a case study of people with physical disability | Stewart, 1999      | South Africa                             | Not Reported                 | None              | The purpose of this case study of a SCI self-help group is (1) To share the experiences of both the health professional and group members in moving from an originally professionally-led group to an independent peer-led group (2) To demonstrate how participatory research may serve as a tool for group empowerment and self-reliance; and (3) To illustrate how a critically informed professional group work praxis may enable marginalized groups to take action for social change. | Case Report     | Spinal Cord Injury | 12                     | This case study shows how group participation with a participatory research framework can unlock self-reliance and empowerment. It also offers insight to the group process and the role of health professionals to create opportunities for empowerment and self-reliance for people with a disability. |
| The Effect of a Trauma Risk Management (TriM) Program on Stigma and Barriers to Help-Seeking in the Police                    | Watson, 2018       | UK                                       | November 2012 - January 2013 | None              | The primary aim of this study was to investigate differences between Trauma Risk Management (TriM) and non-TriM-using forces on help-seeking and stigma among serving police personnel. In addition, the study explored whether                                                                                                                                                                                                                                                             | Cross Sectional | Mixed Injury group | 859                    | The TriM group reported lower levels of PTSD symptoms and showed less stigmatized views towards mental health difficulties. They also perceived fewer barriers to help-seeking.                                                                                                                          |

|                                                                                       |                    |                                          |                        |                   | TriM had any effect on PTSD symptoms.                                                                                                                                   |                 |                                    |                        |                                                                                                                                                                                                                                                                                                                                                                                                          |
|---------------------------------------------------------------------------------------|--------------------|------------------------------------------|------------------------|-------------------|-------------------------------------------------------------------------------------------------------------------------------------------------------------------------|-----------------|------------------------------------|------------------------|----------------------------------------------------------------------------------------------------------------------------------------------------------------------------------------------------------------------------------------------------------------------------------------------------------------------------------------------------------------------------------------------------------|
| Title                                                                                 | First Author, Year | Country in which the study was conducted | Data collection period | Funding for Group | Study Aim                                                                                                                                                               | Study Design    | Injury Type                        | Number of participants | Study Findings                                                                                                                                                                                                                                                                                                                                                                                           |
| Online Conversations About Abuse: Responses to IPV Survivors from Support Communities | Whiting, 2022      | Internet                                 | 2019                   | None              | In this analysis we sought to discover the types of responses being offered in reply to survivors' self-disclosures and questions regarding their experiences with IPV. | Qualitative     | Physical Intimate Partner Violence | 451                    | There were three main categories of responses from the data, including support, sharing experiences, and sharing information. The subcategories included specific types of help, advice, understanding, and were overwhelmingly positive in their tone and content.                                                                                                                                      |
| The self-help movement in head injury                                                 | Williams, 1990     | USA                                      | Not Reported           | None              | A survey to describe self-help groups and their benefits                                                                                                                | Cross Sectional | Brain Injury                       | 77                     | The main focus of meetings was social support. Membership varies by time after injury, sex, and relationship to survivors, and these variables impact how the support group meets the needs of its members. Group leaders should often survey the group to ensure needs are being met. The study suggests that nurses may provide an important role in recruitment, information, and group facilitation. |

| Title                                                 | First Author, Year | Country in which the study was conducted | Data collection period | Funding for Group                           | Study Aim                                                                                                                                                                                                                                                                                            | Study Design                                        | Injury Type                        | Number of participants | Study Findings                                                                                                                                                                                                                                                                               |
|-------------------------------------------------------|--------------------|------------------------------------------|------------------------|---------------------------------------------|------------------------------------------------------------------------------------------------------------------------------------------------------------------------------------------------------------------------------------------------------------------------------------------------------|-----------------------------------------------------|------------------------------------|------------------------|----------------------------------------------------------------------------------------------------------------------------------------------------------------------------------------------------------------------------------------------------------------------------------------------|
| Support groups for older victims of domestic violence | Wolf, 2001         | US/Canada                                | 1997                   | Domestic violence programs, ageing services | To identify support groups for older victims of abuse, to gather information that would be useful in assisting communities to meet the needs of these elders, and to determine whether the type of sponsorship (aging services or domestic violence programs) made a difference in group operations. | Mixed Methods (cross sectional survey & interviews) | Physical Intimate Partner Violence | 30 support groups      | <p>Recommendations for future groups include accessibility of the meeting site, using a leader familiar with aging issues or an elder themselves, resources for recruitment, and a steady source of funding.</p> <p>Resistance of elders to participate was noted to be a large barrier.</p> |

## **References:**

1. Injuries and violence [Internet]. [cited 2021 Nov 18]. Available from: <https://www.who.int/news-room/fact-sheets/detail/injuries-and-violence>
2. Alonge O, Agrawal P, Talab A, Rahman QS, Rahman AF, Arifeen SE, et al. Fatal and non-fatal injury outcomes: results from a purposively sampled census of seven rural subdistricts in Bangladesh. *The Lancet Global Health*. 2017 Aug 1;5(8):e818–27.
3. Whitaker J, Denning M, O’Donohoe N, Poenaru D, Guadagno E, Leather A, et al. Assessing trauma care health systems in low- and middle-income countries, a protocol for a systematic literature review and narrative synthesis. *Systematic Reviews*. 2019 Jul 2;8(1):157.
4. Min SY, Whitecraft J, Rothbard AB, Salzer MS. Peer Support for Persons with Co-Occurring Disorders and Community Tenure: A Survival Analysis. *Psychiatric Rehabilitation Journal*. 2007;30(3):207–13.
5. Jordan G, Grazioplene R, Florence A, Hammer P, Funaro MC, Davidson L, et al. Generativity among persons providing or receiving peer or mutual support: A scoping review. *Psychiatric Rehabilitation Journal* [Internet]. 2021 Oct 7 [cited 2021 Nov 30]; Available from: <http://doi.apa.org/getdoi.cfm?doi=10.1037/prj0000498>
6. Liang D, Jia R, Zhou X, Lu G, Wu Z, Yu J, et al. The effectiveness of peer support on self-efficacy and self-management in people with type 2 diabetes: A meta-analysis. *Patient Educ Couns*. 2021 Apr;104(4):760–9.
7. Hossain SN, Jaglal SB, Shepherd J, Perrier L, Tomasone JR, Sweet SN, et al. Web-Based Peer Support Interventions for Adults Living With Chronic Conditions: Scoping Review. *JMIR Rehabil Assist Technol*. 2021 May 25;8(2):e14321.
8. Shalaby RAH, Agyapong VIO. Peer Support in Mental Health: Literature Review. *JMIR Ment Health*. 2020 Jun 9;7(6):e15572.
9. Solomon P. Peer Support/Peer Provided Services Underlying Processes, Benefits, and Critical Ingredients. *Psychiatric Rehabilitation Journal*. 2004;27(4):392–401.
10. Berg RC, Page S, Øgård-Repål A. The effectiveness of peer-support for people living with HIV: A systematic review and meta-analysis. *PLoS One*. 2021;16(6):e0252623.
11. Kun KE, Couto A, Jobarteh K, Zulliger R, Pedro E, Malimane I, et al. Mozambique’s Community Antiretroviral Therapy Support Group Program: The Role of Social Relationships in Facilitating HIV/AIDS Treatment Retention. *AIDS Behav*. 2019 Sep;23(9):2477–85.
12. McLeish J, Redshaw M. Mothers’ accounts of the impact on emotional wellbeing of organised peer support in pregnancy and early parenthood: a qualitative study. *BMC Pregnancy Childbirth*. 2017 Jan 13;17(1):28.

13. Gruß I, Firemark A, Davidson A. Motherhood, substance use and peer support: Benefits of an integrated group program for pregnant and postpartum women. *J Subst Abuse Treat*. 2021 Dec;131:108450.
14. O'Mara-Eves A, Brunton G, Oliver S, Kavanagh J, Jamal F, Thomas J. The effectiveness of community engagement in public health interventions for disadvantaged groups: a meta-analysis. *BMC Public Health*. 2015 Feb 12;15(1):129.
15. Lauckner HM, Hutchinson SL. Peer support for people with chronic conditions in rural areas: a scoping review. *Rural Remote Health*. 2016 Mar;16(1):3601.
16. Maxwell C, Aggleton P, Warwick I. Involving HIV-positive people in policy and service development: Recent experiences in England. *null*. 2008 Jan 1;20(1):72–9.
17. Carter A, Greene S, Nicholson V, O'Brien N, Sanchez M, de Pokomandy A, et al. Breaking the Glass Ceiling: Increasing the Meaningful Involvement of Women Living With HIV/AIDS (MIWA) in the Design and Delivery of HIV/AIDS Services. *null*. 2015 Aug 3;36(8):936–64.
18. Arksey H, O'Malley L. Scoping studies: towards a methodological framework. *null*. 2005 Feb 1;8(1):19–32.
19. Levac D, Colquhoun H, O'Brien KK. Scoping studies: advancing the methodology. *Implementation Science*. 2010 Sep 20;5(1):69.
20. Veritas Health Innovation. Covidence systematic review software [Internet]. Melbourne, Australia; Available from: [www.covidence.org](http://www.covidence.org)
21. Backhaus S, Ibarra S, Parrott D, Malec J. Comparison of a Cognitive-Behavioral Coping Skills Group to a Peer Support Group in a Brain Injury Population. *Arch Phys Med Rehabil*. 2016 Feb;97(2):281–91.
22. Badger K, Royse D. Helping others heal: burn survivors and peer support. *Social work in health care*. 2010;49(1):1–18.
23. MacEachen E, Kosny A, Ferrier S. Unexpected barriers in return to work: lessons learned from injured worker peer support groups. *Work*. 2007;29(2):155–64.
24. Jalovcic D, Pentland W. Accessing Peers' and Health Care Experts' Wisdom: A Telephone Peer Support Program for Women with SCI Living in Rural and Remote Areas. *Topics in Spinal Cord Injury Rehabilitation*. 2009 Aug 16;15(1):59–74.
25. Stewart R, Bhagwanjee A. Promoting group empowerment and self-reliance through participatory research: a case study of people with physical disability. *Disabil Rehabil*. 1999 Jul;21(7):338–45.
26. Schulz CH. Helping factors in a peer-developed support group for persons with head injury, Part 2: Survivor interview perspective. *Am J Occup Ther*. 1994 Apr;48(4):305–9.

27. Morris M, Daluiski A, Dy C. A Thematic Analysis of Online Discussion Boards for Brachial Plexus Injury. *The Journal of hand surgery* [Internet]. 2016 Aug [cited 2023 Mar 9];41(8). Available from: <https://pubmed.ncbi.nlm.nih.gov/27311862/>
28. Schwartzberg SL. Helping factors in a peer-developed support group for persons with head injury, Part 1: Participant observer perspective. *Am J Occup Ther*. 1994 Apr;48(4):297–304.
29. Mignone J, Guidotti TL. Support groups for injured workers: process and outcomes. *J Occup Environ Med*. 1999 Dec;41(12):1059–64.
30. Williams MH. The self-help movement in head injury. *Rehabil Nurs*. 1990;15(6):311–5.
31. Whiting JB, Davies BN, Eisert BC, Witting AB, Anderson SR. Online Conversations About Abuse: Responses to IPV Survivors from Support Communities. *J Fam Violence*. 2022 Jul 22;1–11.
32. Levy BB, Luong D, Bayley MT, Sweet SN, Voth J, Kastner M, et al. A Pilot Feasibility Randomized Controlled Trial on the Ontario Brain Injury Association Peer Support Program. *J Clin Med*. 2021 Jun 29;10(13):2913.
33. Lau SKC, Luong D, Sweet SN, Bayley M, Levy BB, Kastner M, et al. Using an integrated knowledge translation approach to inform a pilot feasibility randomized controlled trial on peer support for individuals with traumatic brain injury: A qualitative descriptive study. *PLoS One*. 2021;16(8):e0256650.
34. Gelech J, Bayly M, Desjardins M. Constructing robust selves after brain injury: positive identity work among members of a female self-help group. *Neuropsychol Rehabil*. 2019 Apr;29(3):456–76.
35. Badger K, Royse D. Adult burn survivors' views of peer support: a qualitative study. *Soc Work Health Care*. 2010;49(4):299–313.
36. Grieve B, Shapiro GD, Wibbenmeyer L, Acton A, Lee A, Marino M, et al. Long-Term Social Reintegration Outcomes for Burn Survivors With and Without Peer Support Attendance: A Life Impact Burn Recovery Evaluation (LIBRE) Study. *Arch Phys Med Rehabil*. 2020 Jan;101(1S):S92–8.
37. Davis T, Gorgens K, Shriberg J, Godleski M, Meyer L. Making meaning in a burn peer support group: qualitative analysis of attendee interviews. *J Burn Care Res*. 2014;35(5):416–25.
38. Kira IA, Ahmed A, Wasim F, Mahmoud V, Colrain J, Rai D. Group therapy for refugees and torture survivors: treatment model innovations. *Int J Group Psychother*. 2012 Jan;62(1):69–88.
39. Scanlon-Schilpp AM, Levesque J. Helping the patient cope with the sequelae of trauma through the self-help group approach. *J Trauma*. 1981 Feb;21(2):135–9.

40. Molina O, Lawrence SA, Azhar-Miller A, Rivera M. Divorcing Abused Latina Immigrant Women's Experiences With Domestic Violence Support Groups. *Journal of Divorce & Remarriage*. 2009 Sep 30;50(7):459–71.
41. Morales-Campos DY, Casillas M, McCurdy SA. From isolation to connection: understanding a support group for Hispanic women living with gender-based violence in Houston, Texas. *J Immigr Minor Health*. 2009 Feb;11(1):57–65.
42. Balmer BR, Sippola J, Beehler S. Processes and outcomes of a communalization of trauma approach: Vets & Friends community-based support groups. *J Community Psychol*. 2021 Sep;49(7):2764–80.
43. Wolf RS. Support groups for older victims of domestic violence. *J Women Aging*. 2001;13(4):71–83.
44. Larance L, Porter M. Observations From Practice: Support Group Membership as a Process of Social Capital Formation Among Female Survivors of Domestic Violence | Office of Justice Programs. *Journal of Interpersonal Violence*. 2004 Jun;19(6):676–90.
45. Watson L, Andrews L. The effect of a Trauma Risk Management (TRiM) program on stigma and barriers to help-seeking in the police. *International Journal of Stress Management*. 2018;25:348–56.
46. Rivara F, Adhia A, Lyons V, Massey A, Mills B, Morgan E, et al. The Effects Of Violence On Health. *Health Affairs*. 2019 Oct;38(10):1622–9.
47. Craig A, Tran Y, Guest R, Gopinath B, Jagnoor J, Bryant RA, et al. Psychological impact of injuries sustained in motor vehicle crashes: systematic review and meta-analysis. *BMJ Open*. 2016 Sep 1;6(9):e011993.
48. Hardy BM, King KL, Enninghorst N, Balogh ZJ. Trends in polytrauma incidence among major trauma admissions. *Eur J Trauma Emerg Surg [Internet]*. 2022 Dec 19 [cited 2023 Jul 8]; Available from: <https://doi.org/10.1007/s00068-022-02200-w>
49. Carr MJ, Badiee J, Benham DA, Diaz JA, Calvo RY, Sise CB, et al. Fragmentation of care in the blunt abdominal trauma patient: Capturing our true outcomes and impact on care. *J Trauma Acute Care Surg*. 2021 Nov 1;91(5):829–33.
50. Nantulya VM, Reich MR. The neglected epidemic: road traffic injuries in developing countries. *BMJ*. 2002 May 11;324(7346):1139–41.
51. Global Burden of Disease 2016 Injury Collaborators, Naghavi M, Marczak LB, Kutz M, Shackelford KA, Arora M, et al. Global Mortality From Firearms, 1990-2016. *JAMA*. 2018 Aug 28;320(8):792–814.
52. Rissanen R, Ifver J, Hasselberg M, Berg HY. Quality of life following road traffic injury: the impact of age and gender. *Qual Life Res*. 2020 Jun 1;29(6):1587–96.
53. Dain K. A new chapter for the NCD Alliance: stronger together. *The Lancet*. 2019 May 27;389(10084):2089–90.

54. Meara JG, Leather AJM, Hagander L, Alkire BC, Alonso N, Ameh EA, et al. Global Surgery 2030: evidence and solutions for achieving health, welfare, and economic development. *The Lancet*. 2015;386(9993):569–624.
55. Riddell MA, Edwards N, Thompson SR, Bernabe-Ortiz A, Praveen D, Johnson C, et al. Developing consensus measures for global programs: lessons from the Global Alliance for Chronic Diseases Hypertension research program. *Global Health*. 2017 Mar 15;13(1):17.
56. Brownson CA, Heisler M. The role of peer support in diabetes care and self-management. *Patient*. 2009 Mar 1;2(1):5–17.
57. Brooks H, Devereux-Fitzgerald A, Richmond L, Bee P, Lovell K, Caton N, et al. Assessing the effectiveness of social network interventions for adults with a diagnosis of mental health problems: a systematic review and narrative synthesis of impact. *Soc Psychiatry Psychiatr Epidemiol*. 2022 May;57(5):907–25.
58. Parry M, Watt-Watson J. Peer support intervention trials for individuals with heart disease: a systematic review. *Eur J Cardiovasc Nurs*. 2010 Mar;9(1):57–67.
59. Wasilewski MB, Rios J, Simpson R, Hitzig SL, Gotlib Conn L, MacKay C, et al. Peer support for traumatic injury survivors: a scoping review. *Disabil Rehabil*. 2022 Jun 9;1–34.
60. Shanthakumar D, Payne A, Leitch T, Alfa-Wali M. Trauma Care in Low- and Middle-Income Countries. *Surg J (N Y)*. 2021 Oct 22;7(4):e281–5.
61. Fisher EB. Global Evidence for Peer Support: Humanizing Health Care [Internet]. *Peers for Progress*; National Council of La Raza; 2014 [cited 2023 Mar 21]. Available from: <https://www.ipfcc.org/bestpractices/global-evidence-for-peer-support.pdf>
62. Øgård-Repål A, Berg RC, Fossum M. Peer Support for People Living With HIV: A Scoping Review. *Health Promot Pract*. 2023 Jan;24(1):172–90.
63. Ayala G, Sprague L, Merwe LLA van der, Thomas RM, Chang J, Arreola S, et al. Peer- and community-led responses to HIV: A scoping review. *PLOS ONE*. 2021 Dec 1;16(12):e0260555.
64. Park HY, Kim MJ, Kim JY, Kim S, Choi JY, Kim JH, et al. Could Peer Support Programs Be a Good Resource for Managing the Unmet Needs of Cancer Patients? *J Canc Educ*. 2019 Oct 1;34(5):950–7.
65. Lyons N, Cooper C, Lloyd-Evans B. A systematic review and meta-analysis of group peer support interventions for people experiencing mental health conditions. *BMC Psychiatry*. 2021 Jun 23;21(1):315.
66. Arjadi R, Nauta MH, Chowdhary N, Bockting CLH. A systematic review of online interventions for mental health in low and middle income countries: a neglected field. *Glob Ment Health (Camb)*. 2015;2:e12.



## SUPPLEMENT 1: SEARCH STRATEGIES BY DATABASE

PubMed / Medline (National Library of Medicine, NCBI)  
2,343 records March 1, 2023

("Self-Help Groups"[Mesh:NoExp] OR community engagement[tiab] OR community group\*[tiab] OR community support[tiab] OR help group\*[tiab] OR patient support[tiab] OR peer support[tiab] OR peer counsel\*[tiab] OR support group\*[tiab] OR online support[tiab])

AND

("Wounds and Injuries"[Mesh] OR "Accidents"[Mesh] OR "Violence"[Mesh] OR accidental[tiab] OR accidents[tiab] OR burn[tiab] OR burns[tiab] OR domestic abuse[tiab] OR fallers[tiab] OR falls[tiab] OR fractures[tiab] OR gunshot[tiab] OR injuries[tiab] OR injury[tiab] OR injured[tiab] OR partner abuse[tiab] OR physical abuse[tiab] OR spousal abuse[tiab] OR spouse abuse[tiab] OR stabbing\*[tiab] OR trauma[tiab] OR traumas[tiab] OR wound[tiab] OR wounds[tiab] OR violence[tiab])

Cumulative Index to Nursing and Allied Health Literature (CINAHL Complete, EBSCOhost)  
1077 records, March 1, 2023

Advanced Search

Search Options

remove:

Apply equivalent subjects

select:

Publication Type: Journal Article

MH "Support Groups" OR MH "Peer Counseling"

OR title OR abstract:

"community engagement" OR "community group\*" OR "community support" OR "help group\*" OR "patient support" OR "peer support" OR "support group\*" OR "online support"

AND

MH "Wounds and Injuries+" OR MH "Accidents+" OR MH "Trauma" OR MH "Violence+"

OR title OR abstract

accidental OR accidents OR burn OR burns OR "domestic abuse" OR fallers OR falls OR fractures OR gunshot OR injuries OR injury OR injured OR "partner abuse" OR "physical abuse" OR "spousal abuse" OR "spouse abuse" OR stabbing\* OR trauma OR traumas OR wound OR wounds OR violence

Web of Science Core Collection (Clarivate)

1,569 records, March 1, 2023

Editions:

Science Citation Index Expanded

Social Sciences Citation Index

Advanced Search

More Options: Exact Search

#1

(TI=("community engagement" OR "community group\*" OR "community support" OR "help group\*" OR "patient support" OR "peer support" OR "support group\*" OR "online support")) OR AB=("community engagement" OR "community group\*" OR "community support" OR "help group\*" OR "patient support" OR "peer support" OR "support group\*" OR "online support")

AND

(TI=(accidental OR accidents OR burn OR burns OR domestic abuse OR fallers OR falls OR fractures OR gunshot OR injuries OR injury OR injured OR "partner abuse" OR "physical abuse" OR "spousal abuse" OR "spouse abuse" OR stabbing\* OR trauma OR traumas OR wound OR wounds OR violence)) OR (AB=( accidental OR accidents OR burn OR burns OR domestic abuse OR fallers OR falls OR fractures OR gunshot OR injuries OR injury OR injured OR "partner abuse" OR "physical abuse" OR "spousal abuse" OR "spouse abuse" OR stabbing\* OR trauma OR traumas OR wound OR wounds OR violence))

#1 AND #2

PubMed: 2,343

CINAHL: 1077

Web of Science Core Collection: 1,569

total # of references retrieved across 3 databases March 1, 2023: 4,989

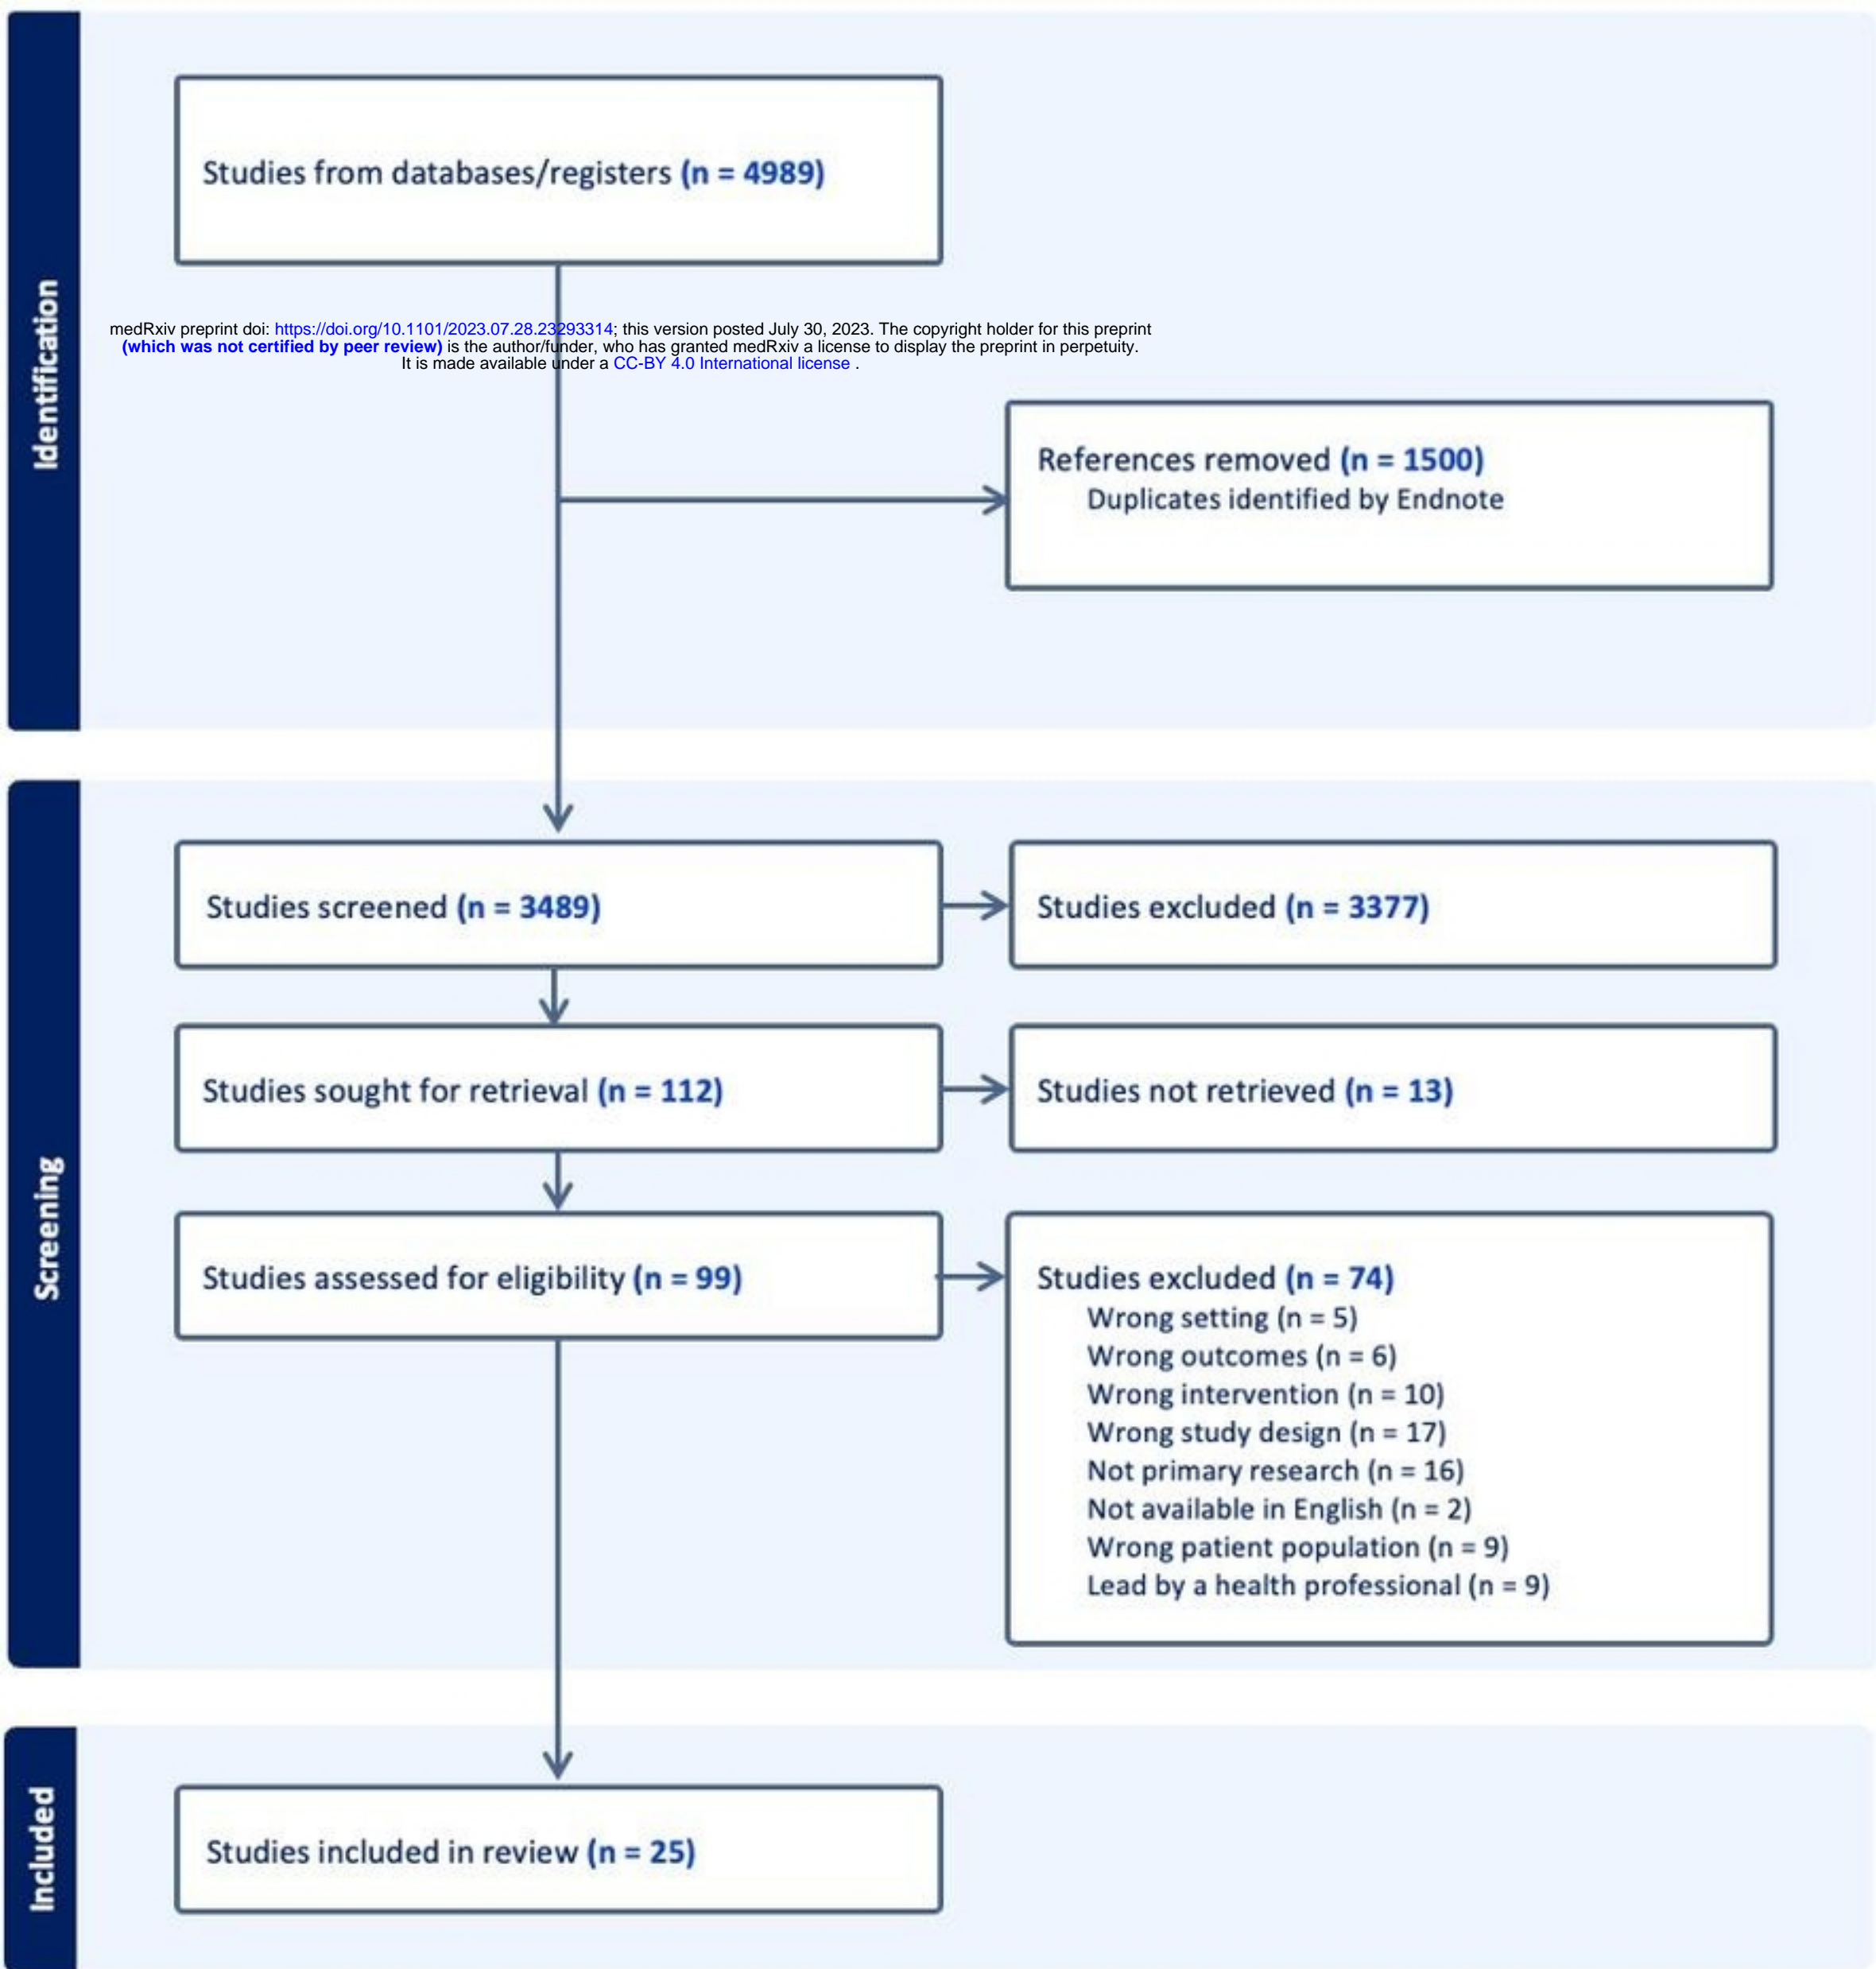

Figure 1

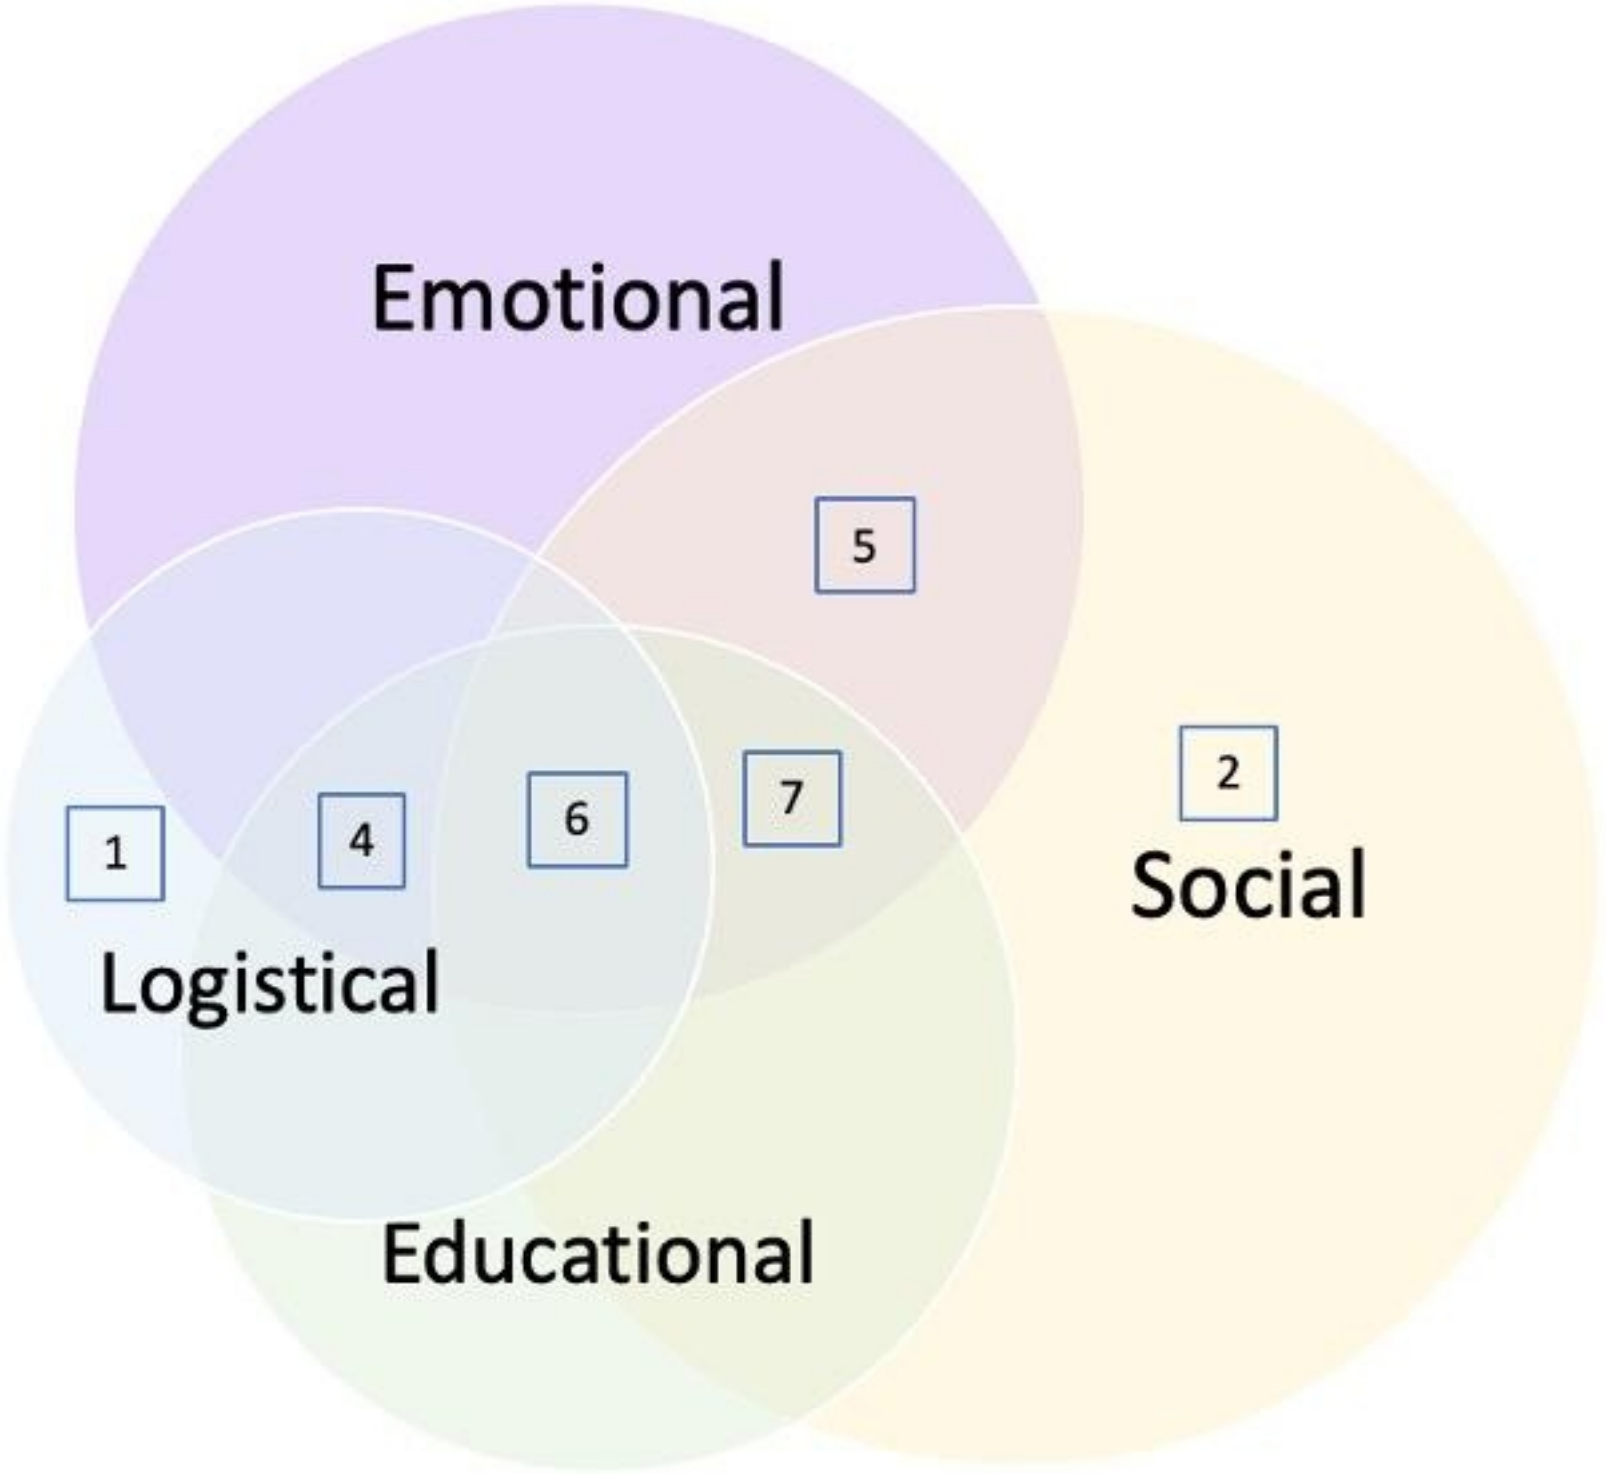

Figure 2
